# Supplementary material
Source: publisher figshare collection journal article supplement (https://acs.figshare.com/ndownloader/files/15112433)
Supplement: Supplementary file 1 [file 15112433]

## Supporting Information

**Manuscript title:** Atomically dispersed cobalt- and nitrogen-codoped graphene towards bifunctional catalysis of oxygen reduction and hydrogen evolution reactions

**Authors list:** Xudong Wen, Lu Bai, Min Li, Jingqi Guan

### List of content:

|                                                                                      |    |
|--------------------------------------------------------------------------------------|----|
| Figure S1. HAADF-STEM image of Co@NG-750 with low resolution.                        | 2  |
| Figure S2. XRD patterns of Co@G-750 and Co@NG-750.                                   | 3  |
| Figure S3. N <sub>2</sub> adsorption–desorption isotherms of Co@G-750 and Co@NG-750. | 4  |
| Figure S4. Double-layer capacitance measurements for the Co@NG-450.                  | 5  |
| Figure S5. Double-layer capacitance measurements for the Co@NG-550.                  | 6  |
| Figure S6. Double-layer capacitance measurements for the Co@NG-650.                  | 7  |
| Figure S7. Double-layer capacitance measurements for the Co@NG-750.                  | 8  |
| Figure S8. Double-layer capacitance measurements for the Co@NG-850.                  | 9  |
| Figure S9. Double-layer capacitance measurements for the Co@G-750.                   | 10 |
| Figure S10. LSV polarization curves for HER on Co@NG-750.                            | 11 |
| Table S1 Elemental compositions of Co-G-750 and Co-NG-T                              | 12 |
| Materials                                                                            | 13 |
| Electrochemical testing                                                              | 14 |
| Characterization                                                                     | 15 |

**Total number of pages:** 15 (S1-S15)

**Total number of figures:** 10 (FigureS1-S10)

**The number of Tables:** 1 (Table S1)

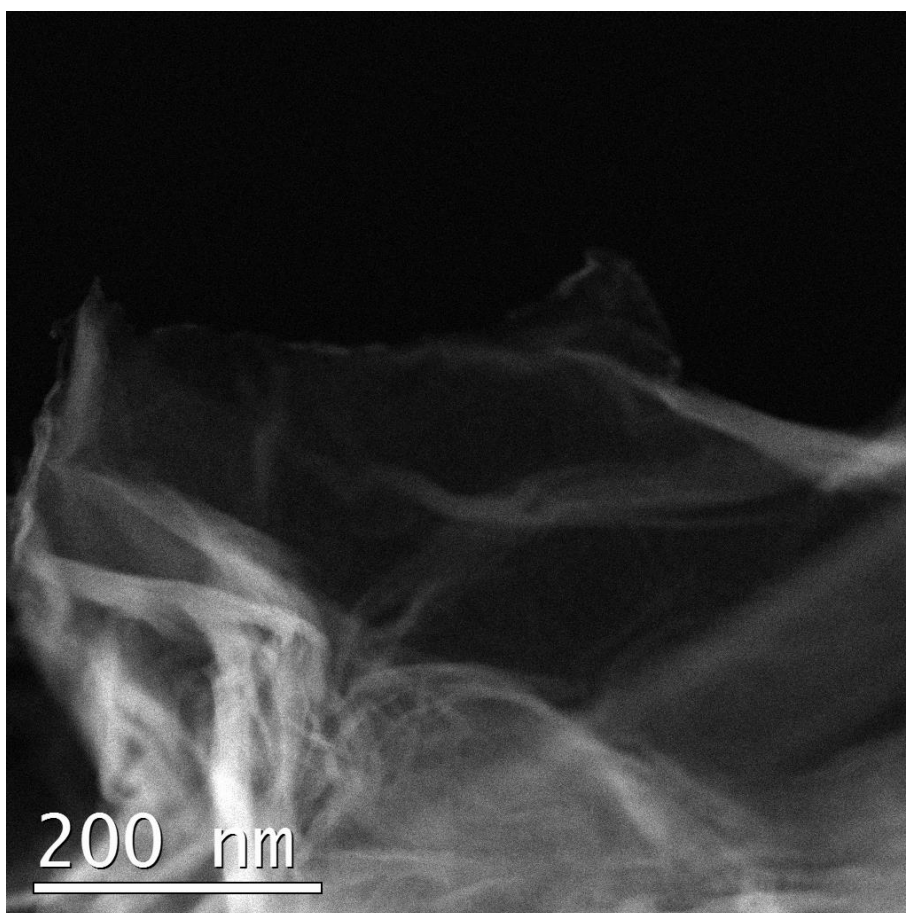

**Figure S1.** HAADF-STEM image of Co@NG-750 with low resolution.

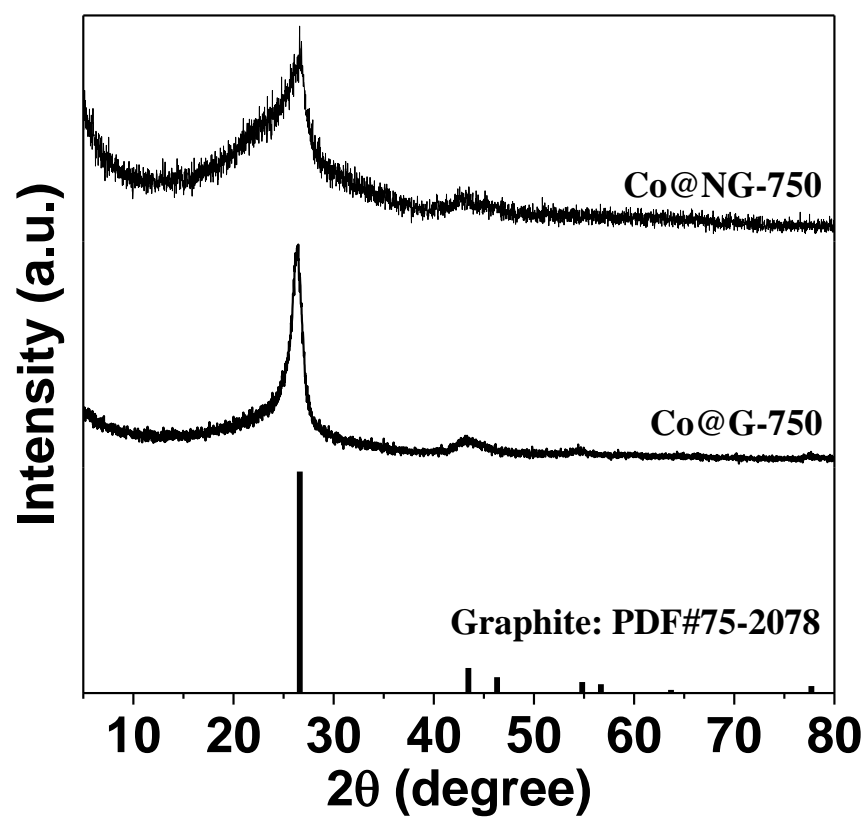

**Figure S2.** XRD patterns of Co@G-750 and Co@NG-750.

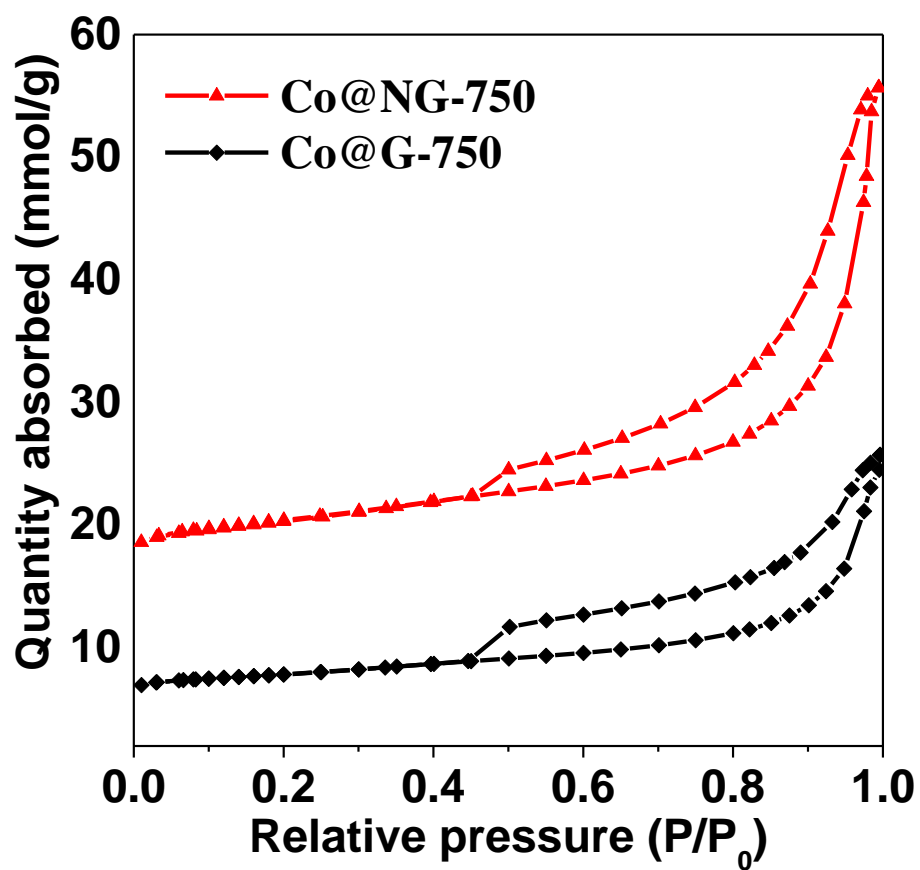

**Figure S3.** N<sub>2</sub> adsorption–desorption isotherms of Co@G-750 and Co@NG-750.

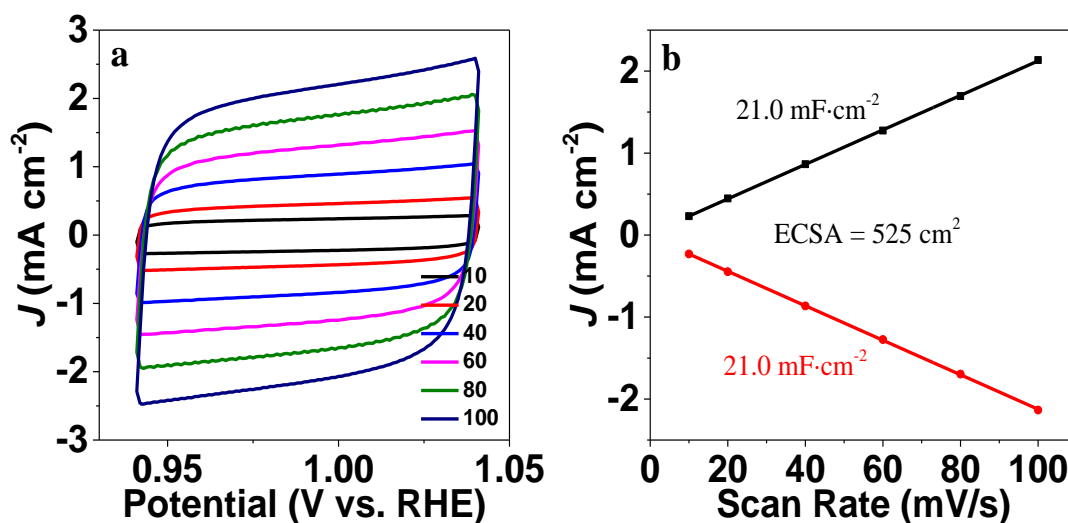

**Figure S4.** Double-layer capacitance measurements for determining the electrochemical active surface area for the Co@NG-450. (a) CVs measured in a non-Faradaic region at scan rate of 10 mV s<sup>-1</sup>, 20 mV s<sup>-1</sup>, 40 mV s<sup>-1</sup>, 60 mV s<sup>-1</sup>, 80 mV s<sup>-1</sup>, and 100 mV s<sup>-1</sup>. (b) The cathodic (black) and anodic (red) currents measured at 1.093 V vs RHE as a function of the scan rate. The average of the absolute value of the slope is taken as the double-layer capacitance of the electrode.

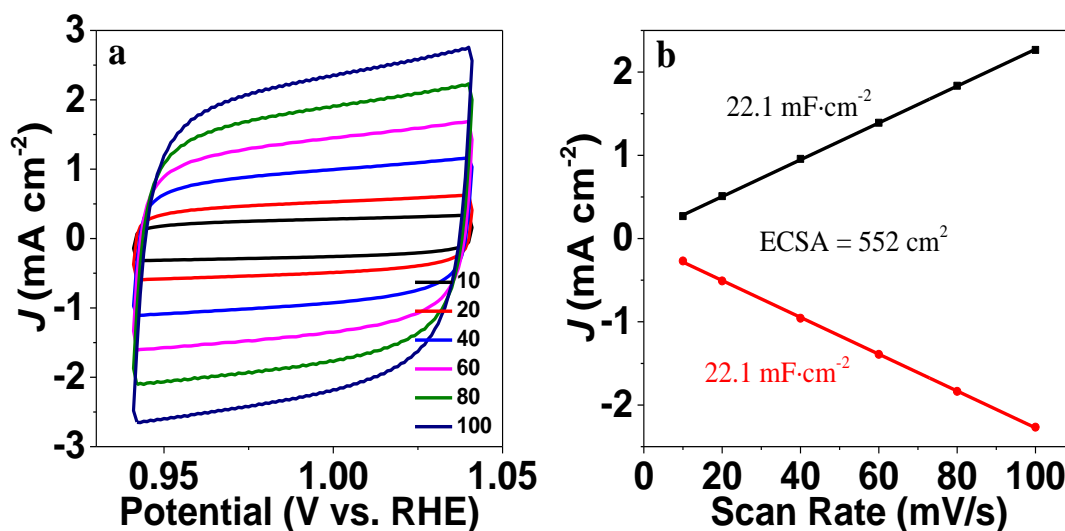

**Figure S5.** Double-layer capacitance measurements for determining the electrochemical active surface area for the Co@NG-550. (a) CVs measured in a non-Faradaic region at scan rate of 10 mV s<sup>-1</sup>, 20 mV s<sup>-1</sup>, 40 mV s<sup>-1</sup>, 60 mV s<sup>-1</sup>, 80 mV s<sup>-1</sup>, and 100 mV s<sup>-1</sup>. (b) The cathodic (black) and anodic (red) currents measured at 1.093 V vs RHE as a function of the scan rate. The average of the absolute value of the slope is taken as the double-layer capacitance of the electrode.

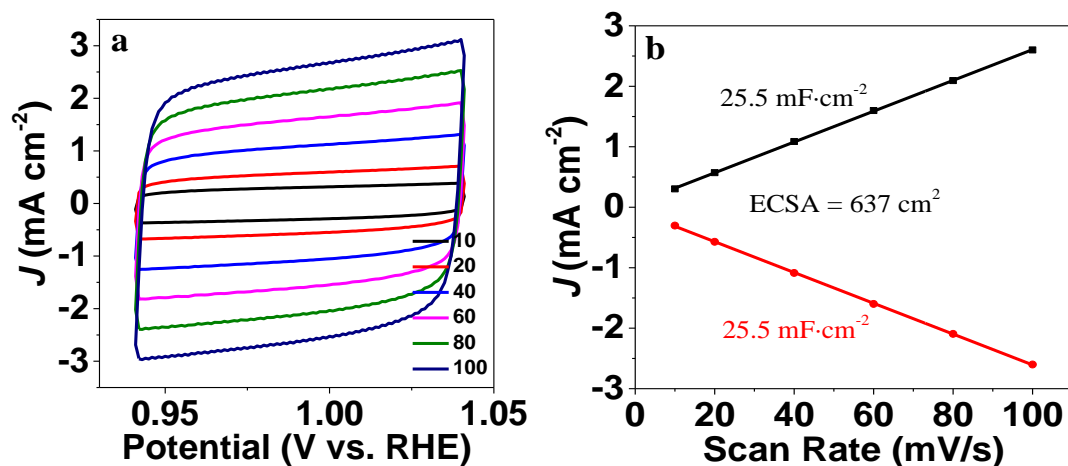

**Figure S6.** Double-layer capacitance measurements for determining the electrochemical active surface area for the Co@NG-650. (a) CVs measured in a non-Faradaic region at scan rate of 10 mV s<sup>-1</sup>, 20 mV s<sup>-1</sup>, 40 mV s<sup>-1</sup>, 60 mV s<sup>-1</sup>, 80 mV s<sup>-1</sup>, and 100 mV s<sup>-1</sup>. (b) The cathodic (black) and anodic (red) currents measured at 1.093 V vs RHE as a function of the scan rate. The average of the absolute value of the slope is taken as the double-layer capacitance of the electrode.

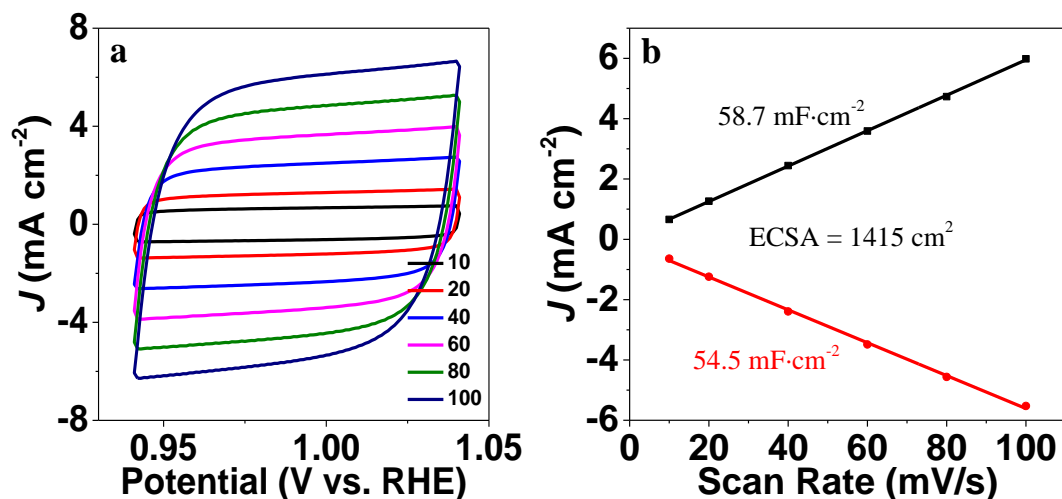

**Figure S7.** Double-layer capacitance measurements for determining the electrochemical active surface area for the Co@NG-750. (a) CVs measured in a non-Faradaic region at scan rate of 10 mV s<sup>-1</sup>, 20 mV s<sup>-1</sup>, 40 mV s<sup>-1</sup>, 60 mV s<sup>-1</sup>, 80 mV s<sup>-1</sup>, and 100 mV s<sup>-1</sup>. (b) The cathodic (black) and anodic (red) currents measured at 1.093 V vs RHE as a function of the scan rate. The average of the absolute value of the slope is taken as the double-layer capacitance of the electrode.



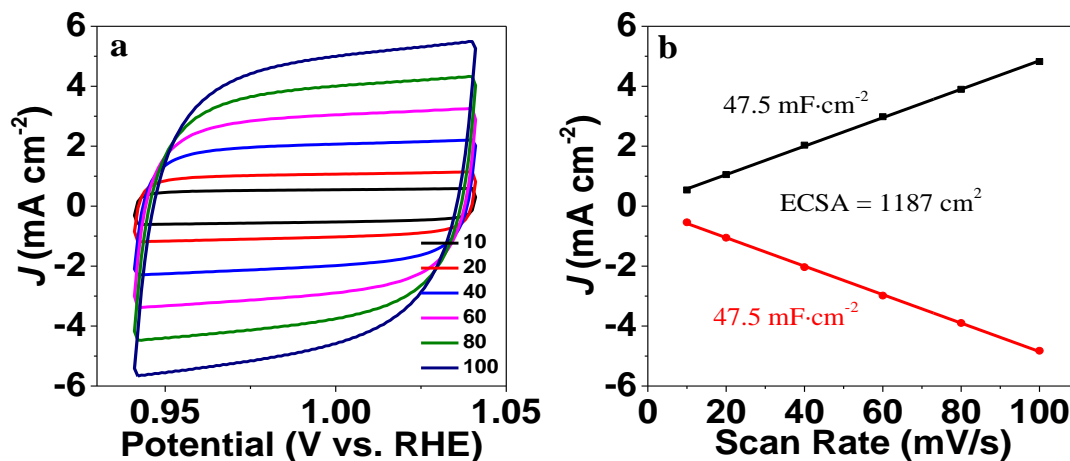

**Figure S8.** Double-layer capacitance measurements for determining the electrochemical active surface area for the Co@NG-850. (a) CVs measured in a non-Faradaic region at scan rate of 10 mV s<sup>-1</sup>, 20 mV s<sup>-1</sup>, 40 mV s<sup>-1</sup>, 60 mV s<sup>-1</sup>, 80 mV s<sup>-1</sup>, and 100 mV s<sup>-1</sup>. (b) The cathodic (black) and anodic (red) currents measured at 1.093 V vs RHE as a function of the scan rate. The average of the absolute value of the slope is taken as the double-layer capacitance of the electrode.

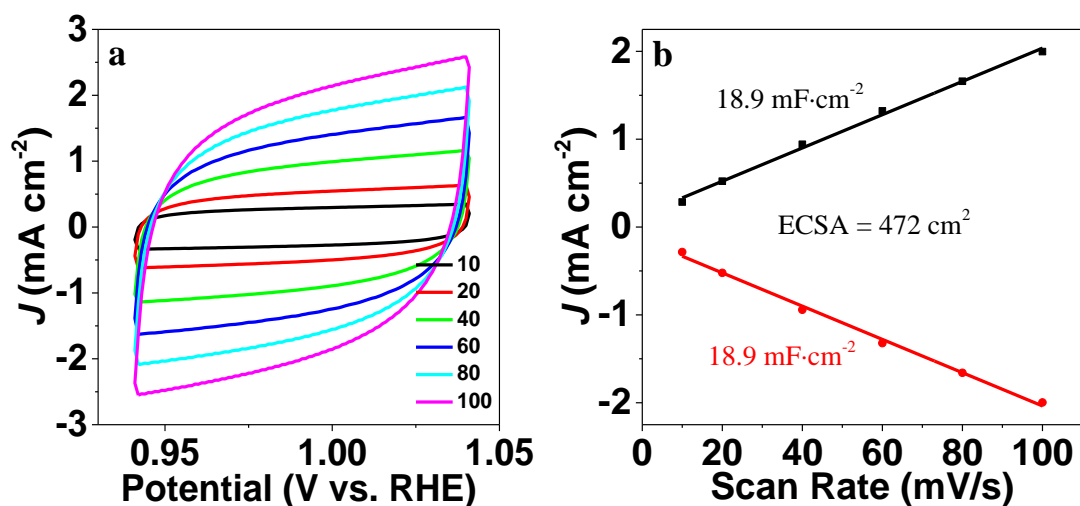

**Figure S9.** Double-layer capacitance measurements for determining the electrochemical active surface area for the Co@G-750. (a) CVs measured in a non-Faradaic region at scan rate of 10 mV s<sup>-1</sup>, 20 mV s<sup>-1</sup>, 40 mV s<sup>-1</sup>, 60 mV s<sup>-1</sup>, 80 mV s<sup>-1</sup>, and 100 mV s<sup>-1</sup>. (b) The cathodic (black) and anodic (red) currents measured at 1.093 V vs RHE as a function of the scan rate. The average of the absolute value of the slope is taken as the double-layer capacitance of the electrode.

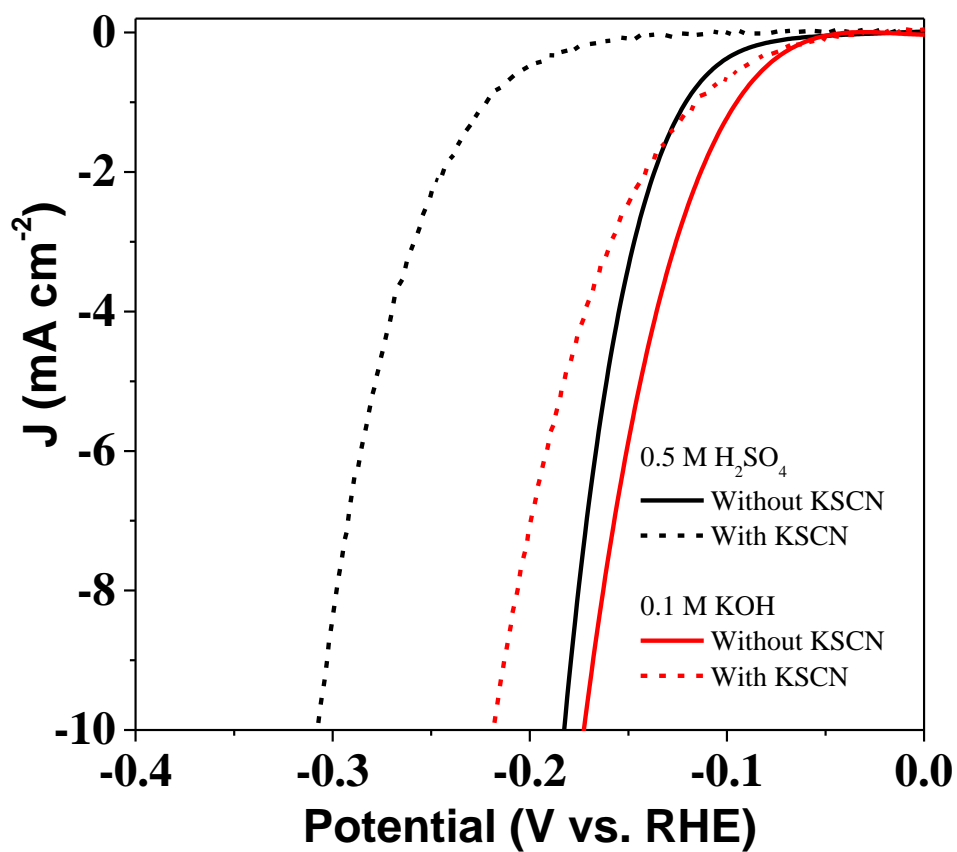

**Figure S10.** LSV polarization curves for HER on Co@NG-750 in 0.1 M KOH and 0.5 M H<sub>2</sub>SO<sub>4</sub> with (dot line) and without (solid line) 10 mM KSCN.

**Table S1** Elemental compositions of Co-G-750 and Co-NG-T annealed at different temperatures

| Sample    | Surface composition ( <i>mol.</i> %) |      |       |      |
|-----------|--------------------------------------|------|-------|------|
|           | C                                    | N    | O     | Co   |
| Co@G-750  | 87.55                                | -    | 12.13 | 0.32 |
| Co@NG-450 | 87.53                                | 4.78 | 7.43  | 0.26 |
| Co@NG-550 | 88.40                                | 5.23 | 6.14  | 0.23 |
| Co@NG-650 | 87.81                                | 6.68 | 5.29  | 0.22 |
| Co@NG-750 | 88.0                                 | 7.92 | 3.88  | 0.20 |
| Co@NG-850 | 92.33                                | 6.75 | 3.67  | 0.25 |

## Materials

Graphite powder (GP), sodium nitrate, potassium permanganate, sulfuric acid (98%), cobalt chloride hexahydrate, potassium hydroxide, ethanol and Pt/C (20 wt.% Pt) were purchased from Sinopharm Chemical Reagent Co. Ltd. (Shanghai, China).  $\text{NH}_3$  (99.99%) and  $\text{N}_2$  (99.99%) were purchased from Juyang Gas (Changchun, China). Ultrapure water (18.2 M $\Omega$ ) was employed. All chemicals were used as received without further purification.

## Electrochemical testing

Electrochemical HER measurements were carried out in a standard three-electrode system. 4 mg of electrocatalyst and 20  $\mu\text{L}$  Nafion solution (5 wt.%) dispersed in 980  $\mu\text{L}$  of ethanol under sonication for 30 min to form a uniform catalyst ink. Then, 5  $\mu\text{L}$  ink was dropped on the glassy carbon electrode (GCE, 3 mm diameter) as the working electrode. A saturated calomel electrode (SCE) and a carbon plate were used as the reference electrode and the counter electrode, respectively. The electrolytes are 0.1 M KOH solution and 0.5 M  $\text{H}_2\text{SO}_4$  solution. All potentials measured were calibrated to RHE using the equation:  $E(\text{vs RHE}) = E(\text{vs SCE}) + 0.241 \text{ V} + 0.0591\text{pH}$ .

Electrochemical ORR measurements were performed on an electrochemical workstation coupled with a rotating disk electrode (RDE) system (Pine Research Instrumentation, USA). The common method used to diagnose electrochemical mechanism is the Koutecky-Levich (K-L) method.<sup>14</sup> The number of electron transfer ( $n$ ) is determined by the slope of the line according to the following K-L equation:

$$\frac{1}{j} = \frac{1}{j_k} + \frac{1}{j_d} = \frac{1}{nFAkC_{\text{O}_2}} + \frac{1}{0.62nFAC_{\text{O}_2}D_{\text{O}_2}^{2/3}\nu^{-1/6}\omega^{1/2}} \quad (1)$$

where  $j$  is the rotating electrode current density,  $j_k$  is the kinetic current density,  $j_d$  is the diffusion-limiting current density,  $n$  is the electron transfer number per  $\text{O}_2$  molecule,  $F$  is the Faraday constant ( $96500 \text{ C mol}^{-1}$ ),  $k$  is the electron transfer rate constant,  $C_{\text{O}_2}$  is the bulk oxygen concentration in electrolyte (0.1 M KOH,  $1.2 \times 10^{-6} \text{ mol L}^{-1}$ ),  $A$  is the electrode geometric area ( $\approx 0.247 \text{ cm}^2$ ),  $D_{\text{O}_2}$  is the diffusion coefficient of oxygen molecule in electrolyte (0.1 M KOH,  $1.9 \times 10^{-5} \text{ cm}^2 \text{ s}^{-1}$ ),  $\nu$  is the kinematic viscosity of the electrolyte (0.1 M KOH,  $0.01 \text{ cm}^2 \text{ s}^{-1}$ ), and  $\omega$  is the electrode rotation speed ( $\text{rad s}^{-1}$ ).

## Characterization

X-ray diffraction (XRD) was carried out on a RIGAKU D/MAX2550/PC diffractometer at 40 kV and 100 mA with copper filtered  $K\alpha$  radiation ( $\lambda = 1.5406 \text{ \AA}$ ). The morphology of the samples was obtained with JEOS JSM 6700F field-emission scanning electron microscope (SEM). Transmission electron microscope (TEM) images were observed by a Hitachi HT7700. High angle annular dark field imaging (HAADF) performed with an aberration-corrected JEM-ARM 200F microscope. X-Ray photoelectron spectroscopy (XPS) was measured on an ESCALAB 250 X-ray electron spectrometer using Al  $K\alpha$  radiation. Region scans were collected using a 20 eV pass energy. Peak positions were calibrated relative to C 1s peak position at 284.6 eV. The cobalt content in the catalysts was determined using inductively coupled plasma atomic emission spectrometer (ICP-AES) on a Shimadzu ICPS-8100. Prior to ICP-AES measurement, 50 mg sample was placed in a 50 mL beaker and calcined in an oven at 520 °C for 6 h to completely remove the carbon. The residue was dissolved in nitric acid and diluted with water to test the cobalt content.
